# Supplementary material for: A Se/C composite as cathode material for rechargeable lithium batteries with good electrochemical performance
Source: Royal Society of Chemistry journal article supplement (doi:10.1039/c3ra48034h), 2014-01-01
Supplement: c3ra48034h.pdf [file c3ra48034h.pdf]

## Supplementary Information

### A Se/C composite as cathode material for rechargeable lithium batteries with good rate performance

Lili Liu<sup>a</sup>, Yuyang Hou<sup>a</sup>, Yaqiong Yang<sup>a</sup>, Minxia Li<sup>a</sup>, Xiaowei Wang<sup>a</sup> and Yuping Wu<sup>a\*</sup>

New Energy and Materials Laboratory (NEML), Department of Chemistry & Shanghai Key

Laboratory of Molecular Catalysis and Innovative Materials, Fudan University, Shanghai 200433,

China

Email: wuyp@fudan.edu.cn

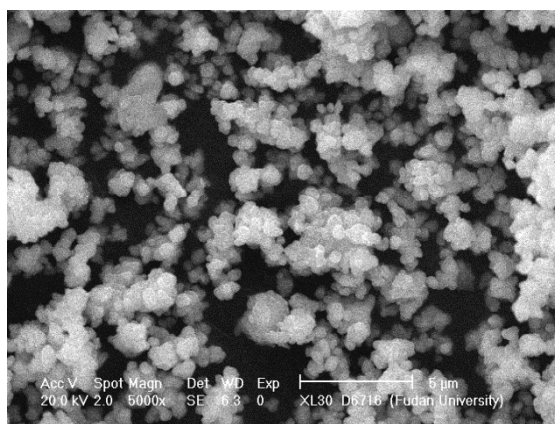

Figure S1. SEM micrograph of the commercial Se particles.

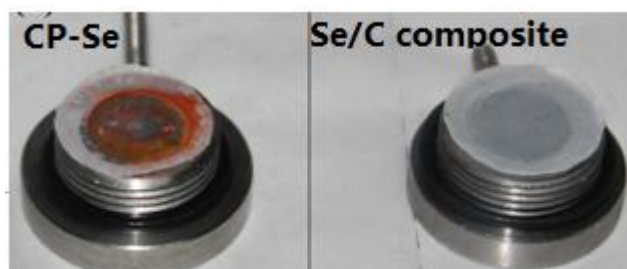

Figure S2. Photos of the membranes after the 5<sup>th</sup> discharge to 0.8 V from the Se/C composite(left) and the CP-Se(right).
